# Supplementary material for: Disialoganglioside GD2-Targeted Near-Infrared Photoimmunotherapy (NIR-PIT) in Tumors of Neuroectodermal Origin
Source: MDPI journal article supplement (doi:10.3390/pharmaceutics14102037), 2022-09-24
Supplement: s1 [file s1]

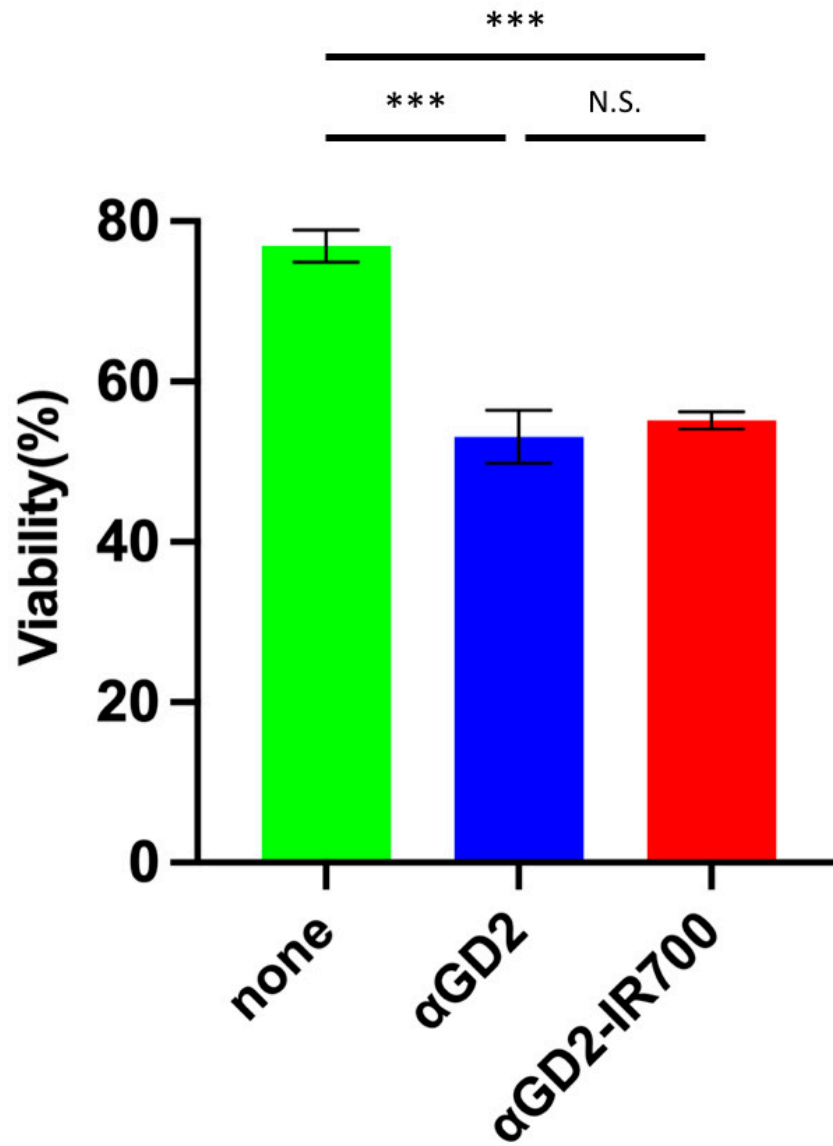

**Figure S1. Cell viability after incubation with αGD2 antibody.** Cell viability after incubation with no antibody, αGD2 antibody, or αGD2-IR700. Cell viability was measured by PI staining. Data are shown as mean ± SEM (n = 4, \*\*\*  $p < 0.001$ ; N.S., not significant).
